# Supplementary material for: A novel thymidylate synthase from the Vibrionales, Alteromonadales, Aeromonadales, and Pasteurellales (VAAP) clade with altered nucleotide and folate binding sites
Source: PeerJ. 2018 Jun 15;6:e5023. doi: 10.7717/peerj.5023 (PMC6005164; doi:10.7717/peerj.5023)
Supplement: File S1 [file peerj-06-5023-s001.xlsx]

## Sheet: Sheet1
Genomes	Assembly Id		Orders	Color Code
Escherichia coli	GCA_000005845.2		Vibrionales
Enterobacter xiangfangensis	GCA_001729785.1		Enterobacteriales
Enterobacter sp. 638	GCA_000016325.1		Pasteurellales
Pectobacterium atrosepticum	GCA_000011605.1		Alteromonadales
Pectobacterium polaris	GCA_002288545.1		Oceanospirales
Salmonella enterica	GCA_000006945.2		Pseudomonadales
Yersinia pestis	GCA_000009065.1		Xanthomonadales
Actinobacillus pleuropneumoniae	GCA_000015885.1
Actinobacillus succinogenes	GCA_000017245.1
Haemophilus influenzae	GCA_000027305.1
Pasteurella multocida	GCA_000754275.1
Marinomonas sp. MWYL1	GCA_000017285.1
Pseudomonas aeruginosa	GCA_000006765.1
Pseudomonas mendocina	GCA_000016565.1
Pseudomonas putida	GCA_000007565.2
Pseudomonas syringae	GCA_000012245.1
Pseudomonas fluorescens	GCA_000237065.1
Pseudoalteromonas arctica	GCA_000238395.4
Pseudoalteromonas marina	GCA_002407085.1
Pseudoalteromonas tunicata	GCA_002310815.1
Pseudoalteromonas atlantica	GCA_000014225.1
Shewanella halifaxensis	GCA_000019185.1
Shewanella amazonensis	GCA_000015245.1
Shewanella baltica	GCA_000178875.2
Shewanella denitrificans	GCA_000013765.1
Shewanella putrefaciens	GCA_000016585.1
Shewanella woodyi	GCA_000019525.1
Shewanella sp. MR-4	GCA_000014685.1
Vibrio anguillarum	GCA_000217675.1
Vibrio breoganii	GCA_001677275.1
Vibrio cholerae	GCA_000006745.1
Vibrio vulnificus	GCA_000009745.1
Vibrio parahaemolyticus	GCA_000196095.1
Vibrio shilonii	GCA_002214345.1
Vibrio fluvialis	GCA_001558415.1
Xanthomonas axonopodis	GCA_000348585.1
Xanthomonas campestris	GCA_000007145.1
Xylella fastidiosa	GCA_000006725.1
